# Supplementary material for: Dissection of Regulatory Networks that Are Altered in Disease via Differential Co-expression
Source: PLoS Comput Biol. 2013 Mar 7;9(3):e1002955. doi: 10.1371/journal.pcbi.1002955 (PMC3591264; doi:10.1371/journal.pcbi.1002955)
Supplement: Table S2 — miRNA enrichment analysis results on DICER gene sets discovered in the AD dataset. (XLSX) [file pcbi.1002955.s007.xlsx]

## Sheet: Sheet1
Table S2: miRNA enrichment analysis results on DICER gene sets discovered in the AD dataset.
Gene set	miRNA	Number of genes	P-value (FDR 0.05)	Enrichment factor
DCMM2	mir-124/506	28	0.0005	2.112
DCMM5	mir-876-5p	4	0.0005	6.976
DCMM5	mir-499/499-5p	7	0.0005	3.602
DCMM7	mir-377	8	0.001	3.607
DCMM8	mir-504	4	0.001	6.982
DCMM9	mir-125/351	4	0.01	4.346
UCMM6	mir-216/216b	4	0.001	5.413
UCMM9	mir-124/506	10	0.0005	3.065
UCMM9	mir-340/340-5p	7	0.005	2.972
DCC11	mir-543	6	0.001	3.757
DCC11	mir-101	6	0.011	2.998
DCC12	mir-200bc/429	5	0.024	2.52
DCC12	mir-590/590-3p	4	0.027	2.566
DCC2	mir-9	4	0.028	2.922
DCC5	mir-9	4	0.012	3.063
DCC6	mir-140/140-5p/876-3p	4	0.003	4.759
DCC9	mir-29abc	4	0.03	3.186
UCC0	mir-203	4	0.0005	11.549
UCC1	mir-410	4	0.004	4.328
UCC1	mir-186	4	0.005	3.571
UCC10	mir-26ab/1297	4	0.014	3.689
UCC10	mir-124/506	6	0.035	2.509
UCC3	mir-148/152	4	0.004	4.246
UCC4	mir-29abc	4	0.037	2.905
UCC4	mir-17-5p/20/93.mr/106/519.d	4	0.046	2.517
UCC6	mir-25/32/92/92ab/363/367	4	0.013	3.588
UCC8	mir-124/506	4	0.042	2.52
For each module, meta-module and cluster detected by DICER the enrichment was tested using the FAME algorithm. Names in bold indicate miRNA that have known relation with the disease according to the mir2disease database. Down and up-correlated meta-modules are indicated as DCMM and UCMM, respectively. Modules are indicated by up and down followed by their number. Differential gene clusters are in…
