# Supplementary material for: Dissection of Regulatory Networks that Are Altered in Disease via Differential Co-expression
Source: PLoS Comput Biol. 2013 Mar 7;9(3):e1002955. doi: 10.1371/journal.pcbi.1002955 (PMC3591264; doi:10.1371/journal.pcbi.1002955)
Supplement: Table S5 — miRNA enrichment analysis results on DICER gene sets discovered in the SLE dataset. (XLSX) [file pcbi.1002955.s010.xlsx]

## Sheet: Sheet1
Table S5: miRNA enrichment analysis results on DICER gene sets discovered in the SLE dataset.
Gene set	miRNA	Number of genes	P-value (FDR 0.05)	Enrichment factor
DCMM2	mir-590/590-3p	5	0.004	3.855
DCMM2	mir-124/506	6	0.019	2.536
DCMM2	mir-182	4	0.026	2.664
DCMM3	mir-182	10	0.001	2.682
DCMM6	mir-383	4	0.0005	7.853
DCMM6	mir-205	5	0.002	3.942
DCMM6	mir-216/216a	4	0.006	5.04
DCMM6	mir-155	4	0.015	3.238
DCMM9	mir-1/206	6	0.002	3.936
UCMM2	mir-590/590-3p	4	0.008	3.749
up_5	mir-590/590-3p	4	0.001	6.266
up_9	mir-124/506	4	0.035	2.385
down_1	mir-15/16/195/424/497	6	0.0005	4.517
down_1	mir-182	4	0.015	3.253
down_4	mir-590/590-3p	5	0.0005	7.188
down_4	mir-124/506	4	0.014	3.357
down_6	mir-182	6	0.002	3.612
down_6	mir-96/1271	5	0.016	3.104
down_12	mir-383	4	0.0005	11.699
down_12	mir-26ab/1297	4	0.029	2.742
down_18	mir-1/206	4	0.012	3.746
down_18	mir-30a/30a-5p/30b/30b-5p/30cde/384-5p	4	0.029	2.888
For each module, meta-module and cluster detected by DICER the enrichment was tested using the FAME algorithm. Down and up-correlated meta-modules are indicated as DCMM and UCMM, respectively. Modules are indicated by up and down followed by their number. Differential gene clusters are indicated by DCC and UCC. See Supplement 2 for full information on all detected groups. No miRNAs related to SLE…
