# Supplementary material for: Dissection of Regulatory Networks that Are Altered in Disease via Differential Co-expression
Source: PLoS Comput Biol. 2013 Mar 7;9(3):e1002955. doi: 10.1371/journal.pcbi.1002955 (PMC3591264; doi:10.1371/journal.pcbi.1002955)
Supplement: Table S6 — miRNA enrichment analysis results on DICER gene sets discovered in the IBD dataset. (XLSX) [file pcbi.1002955.s011.xlsx]

## Sheet: Sheet1
Table S6: miRNA enrichment analysis results on DICER gene sets discovered in the IBD dataset.
Gene set	miRNA	Number of genes	P-value (FDR 0.05)	Enrichment factor
UCMM_0	mir-340/340-5p	15	3.289e-05	2.557
DCMM_0	mir-590/590-3p	15	0.011	1.776
For each module, meta-module and cluster detected by DICER the enrichment was tested using the FAME algorithm. Down and up-correlated meta-modules are indicated as DCMM and UCMM, respectively. Modules are indicated by up and down followed by their number. Differential gene clusters are indicated by DCC and UCC. See Supplement 2 for full information on all detected groups. No miRNAs related to SLE…
